# Supplementary material for: Effect of Organic Food Intake on Nitrogen Stable Isotopes
Source: Nutrients. 2020 Sep 28;12(10):2965. doi: 10.3390/nu12102965 (PMC7601395; doi:10.3390/nu12102965)
Supplement: Supplementary file 1 [file nutrients-12-02965-s001.pdf]

Supplementary Materials

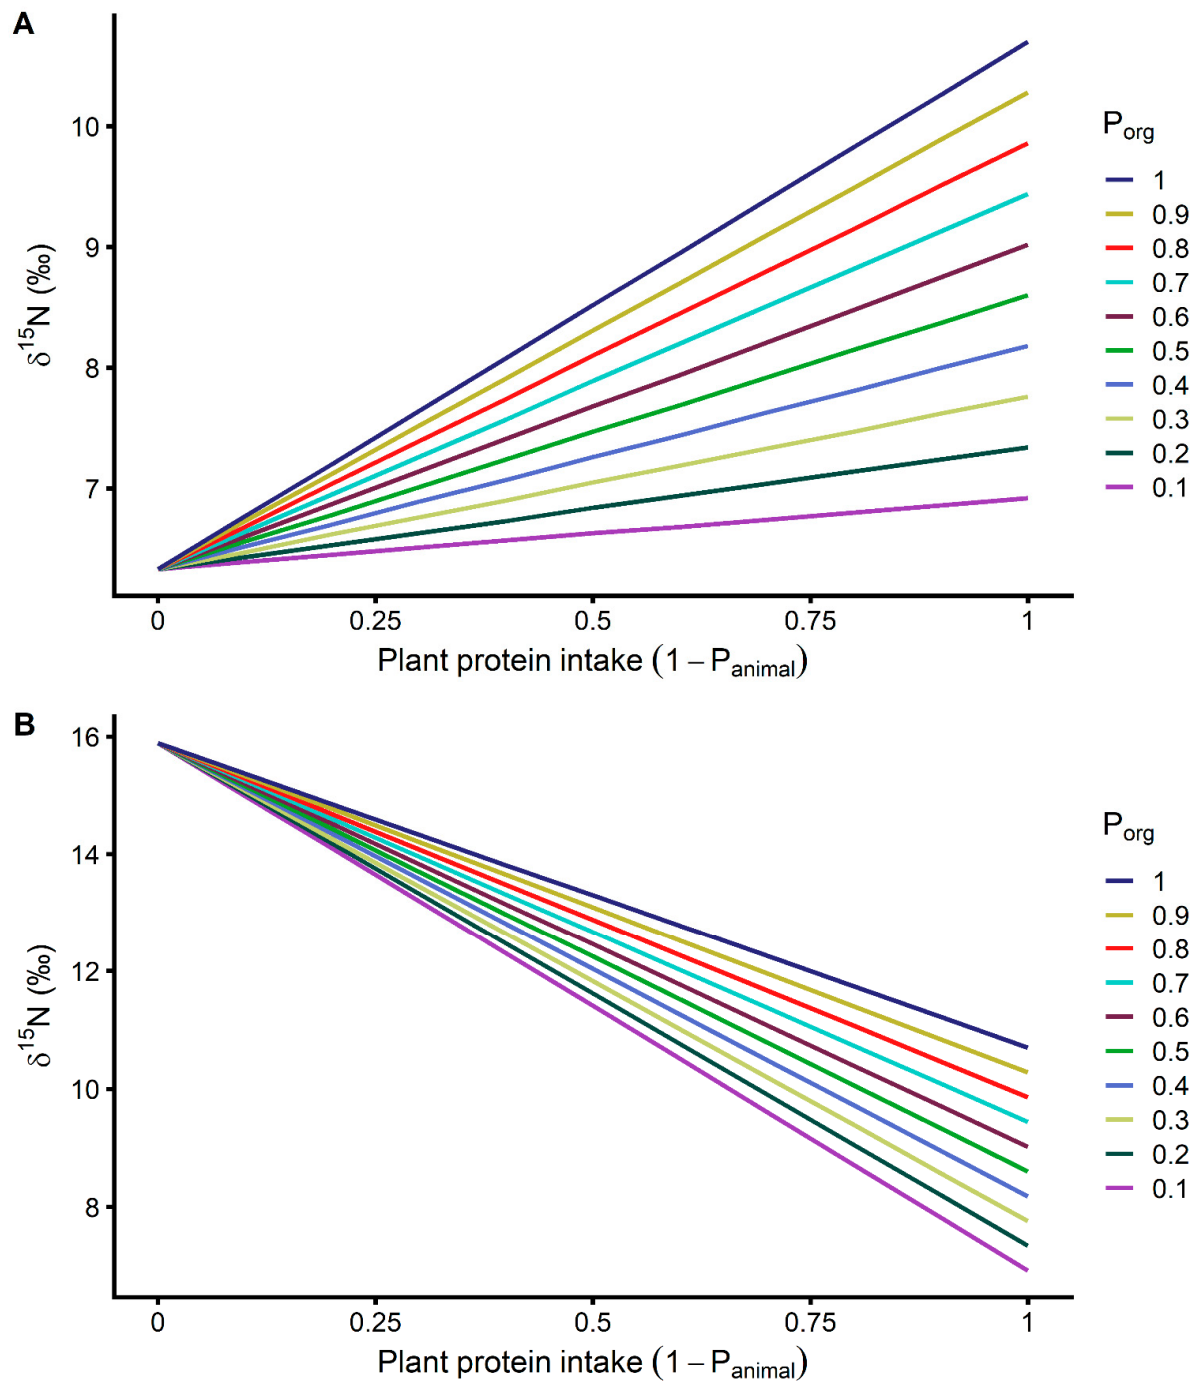

**Figure S1.** Model output (equation 2) showing  $\delta^{15}\text{N}_{\text{tissue proteins}}$  at the low (A) and high (B) ends of the  $\delta^{15}\text{N}_{\text{animal}}$  spectrum. Proportional plant protein intake ( $1 - P_{\text{animal}}$ ) varies from 0 to 1 with 0.1 increments in proportional organic plant intake ( $P_{\text{org}}$ ) plotted.

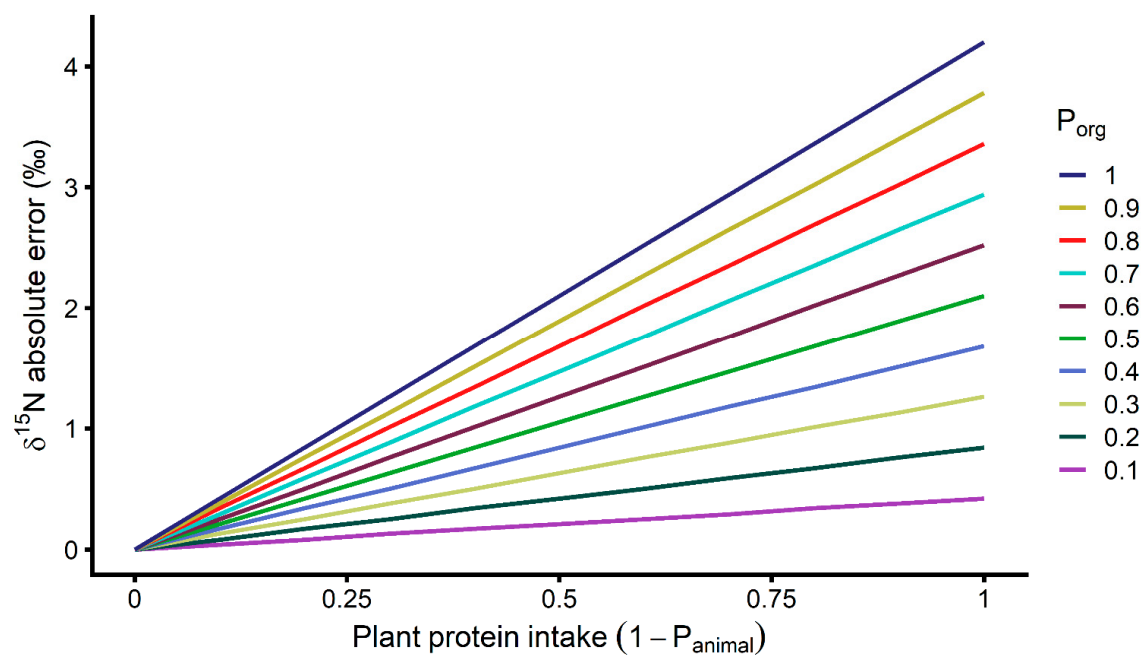

**Figure S2.**  $\delta^{15}\text{N}$  absolute difference resulting from organic plant intake (equation 3). This absolute error is independent of  $\delta^{15}\text{N}_{\text{animal}}$ . Proportional plant protein intake ( $1 - P_{\text{animal}}$ ) varies from 0 to 1 with 0.1 increments in proportional organic plant intake ( $P_{\text{org}}$ ) plotted.

**Table S1.** Edible plant  $\delta^{15}\text{N}$  values. The  $\delta^{15}\text{N}$  values were used for estimating  $\Delta_{\text{org-conv}}$  in equation 1 and are plotted in Figure 1.

| Edible plants          | Fertilization type | $\delta^{15}\text{N}$ | SD   | <i>n</i> | References         |
|------------------------|--------------------|-----------------------|------|----------|--------------------|
| Brassica oleracea L    | conventional       | 3.6                   | 2.9  | 3        | [1]                |
| Brassica oleracea L    | organic            | 16.3                  | 0.4  | 2        | [1]                |
| Broccoli               | conventional       | 4.3                   |      | 3        | [2]                |
| Broccoli               | conventional       | 3.92                  | 2.25 | 12       | [3]                |
| Broccoli               | organic            | 12.2                  |      | 3        | [2]                |
| Broccoli               | organic            | 6.08                  | 1.76 | 5        | [3]                |
| Broccoli               | organic            | 8.96                  | 1.32 | 9        | [3]                |
| Broccoli               | organic            | 12.57                 | 2.81 | 15       | [3]                |
| Cabbage                | conventional       | 5.7                   |      |          | [4] data from [5]  |
| Cabbage                | organic            | 8.7                   |      |          | [4] data from [5]  |
| Carrot                 | conventional       | 4.1                   | 2.6  | 17       | [6]                |
| Carrot                 | conventional       | 3.9                   | 2.3  | 5        | [7]                |
| Carrot                 | conventional       | 3.5                   | 0.4  |          | [8] data from [5]  |
| Carrot                 | organic            | 5.7                   | 3.5  | 13       | [6]                |
| Carrot                 | organic            | 3.7                   | 1.4  | 5        | [7]                |
| Carrot                 | organic            | 6.7                   | 1.0  |          | [8] data from [5]  |
| Cauliflower            | conventional       | 5.5                   | 2.7  | 3        | [7]                |
| Cauliflower            | organic            | 10.7                  | 4.3  | 3        | [7]                |
| Chicory Palla rosa     | organic            | 7.7                   | 1.4  | 4        | [7]                |
| Chicory Palla rosa     | conventional       | 2.0                   | 0.8  | 3        | [7]                |
| Chicory Pan di zuherro | organic            | 5.3                   | 1.7  | 3        | [7]                |
| Chicory Pan di zuherro | conventional       | 2.3                   | 1.4  | 3        | [7]                |
| Clementine             | conventional       | 6.9                   |      | 21       | [9] data from [10] |
| Clementine             | organic            | 7.2                   |      | 31       | [9] data from [10] |
| Corn                   | conventional       | 0.8                   |      | 3        | [2]                |
| Corn                   | organic            | 4.8                   |      | 3        | [2]                |
| Cucumber               | conventional       | 2.7                   |      | 3        | [2]                |
| Cucumber               | conventional       | 3.3                   | 1.4  | 4        | [1]                |
| Cucumber               | organic            | 12.3                  |      | 3        | [2]                |
| Cucumber               | organic            | 13.3                  | 2.6  | 4        | [1]                |

|          |              |       |      |    |                   |
|----------|--------------|-------|------|----|-------------------|
| Eggplant | organic      | 8.5   |      | 3  | [2]               |
| Eggplant | conventional | 4.5   |      | 3  | [2]               |
| Eggplant | conventional | 2.7   | 3.0  | 2  | [1]               |
| Eggplant | organic      | 13.4  |      | 1  | [1]               |
| Endive   | conventional | 0.6   | 2.7  | 3  | [7]               |
| Endive   | organic      | 6.9   | 1.1  | 5  | [7]               |
| Garlic   | conventional | 2.6   | 2.6  | 3  | [7]               |
| Garlic   | organic      | 4.3   | 1.9  | 3  | [7]               |
| Kohlrabi | conventional | 7.8   | 1.3  | 3  | [7]               |
| Kohlrabi | organic      | 6.2   | 4.3  | 3  | [7]               |
| Leek     | conventional | 1.9   | 1.0  | 4  | [7]               |
| Leek     | organic      | 7.3   | 3.0  | 4  | [7]               |
| Lettuce  | conventional | 5.2   |      | 3  | [11]              |
| Lettuce  | organic      | 9.6   |      | 3  | [11]              |
| Lettuce  | organic      | 11.9  | 2.73 | 30 | [3]               |
| Lettuce  | conventional | 2.9   | 4.3  | 55 | [6]               |
| Lettuce  | conventional | 5.3   |      | 3  | [11]              |
| Lettuce  | conventional | 1.77  | 1.71 | 10 | [3]               |
| Lettuce  | conventional | 2.2   |      |    | [8] data from [5] |
| Lettuce  | conventional | 4.1   | 0.6  | 2  | [1]               |
| Lettuce  | organic      | 7.6   | 4.1  | 49 | [6]               |
| Lettuce  | organic      | 8.0   |      | 3  | [11]              |
| Lettuce  | organic      | 21.89 | 2.08 | 9  | [3]               |
| Lettuce  | organic      | 5.68  | 1.17 | 23 | [3]               |
| Lettuce  | organic      | 5.5   |      |    | [8] data from [5] |
| Lettuce  | organic      | 13.5  | 1.0  | 4  | [1]               |
| Maize    | organic      | 8.1   | 1.6  | 6  | [12]              |
| Maize    | conventional | 5.8   | 0.2  | 6  | [12]              |
| Maize    | conventional | 4.2   | 1.1  | 2  | [1]               |
| Maize    | organic      | 21.2  | 0.2  | 6  | [12]              |
| Maize    | organic      | 17.7  | 4.3  | 2  | [1]               |
| Onion    | conventional | 5.2   | 1.8  | 3  | [7]               |

|                     |              |       |      |    |                    |
|---------------------|--------------|-------|------|----|--------------------|
| Onion               | organic      | 6.8   | 1.6  | 3  | [7]                |
| Orange              | conventional | 5.5   |      | 56 | [9] data from [10] |
| Orange              | conventional | 4.64  | 0.35 |    | [13]               |
| Orange              | organic      | 7.6   |      | 42 | [9] data from [10] |
| Orange              | organic      | 6.74  | 0.7  |    | [13]               |
| Orange              | organic      | 8.95  | 0.38 |    | [13]               |
| Orange              | organic      | 8.45  | 0.61 |    | [13]               |
| Parsley             | conventional | 4.5   | 4.5  | 3  | [7]                |
| Parsley             | organic      | 5.4   | 1.1  | 6  | [7]                |
| Peach               | conventional | 0.1   |      | 24 | [9] data from [10] |
| Peach               | organic      | 1.9   |      | 95 | [9] data from [10] |
| Peas                | organic      | 0.3   |      | 3  | [2]                |
| Peas                | conventional | 0.2   |      | 3  | [2]                |
| Pepper              | conventional | -2.4  |      |    | [14]               |
| Pepper              | organic      | 4.3   | 0.2  | 3  | [7]                |
| Pepper              | conventional | -0.5  |      |    | [14]               |
| Pepper              | conventional | 2.2   |      |    | [14]               |
| Pepper              | conventional | 3.5   | 0.7  | 3  | [7]                |
| Pepper              | conventional | 4.7   | 0.9  | 3  | [1]                |
| Pepper              | organic      | 7.9   |      |    | [14]               |
| Pepper              | organic      | 14.5  | 1.2  | 2  | [1]                |
| Pepper              | conventional | 8.72  |      |    | [15]               |
| Pepper              | organic      | 11.16 |      |    | [15]               |
| Perilla ocymoides L | conventional | 4.5   |      | 1  | [1]                |
| Perilla ocymoides L | organic      | 19.9  |      | 1  | [1]                |
| Potato              | conventional | 2.23  |      | 9  | [16]               |
| Potato              | conventional | 3.76  |      | 10 | [16]               |
| Potato              | conventional | 4.13  |      | 10 | [16]               |
| Potato              | conventional | 3.23  |      | 10 | [16]               |
| Potato              | conventional | 0.9   |      | 3  | [2]                |
| Potato              | organic      | 5.7   |      | 10 | [16]               |
| Potato              | organic      | 6.99  |      | 9  | [16]               |

|            |              |       |      |    |                    |
|------------|--------------|-------|------|----|--------------------|
| Potato     | organic      | 10.34 |      | 10 | [16]               |
| Potato     | organic      | 5.68  |      | 10 | [16]               |
| Potato     | organic      | 4.3   |      | 3  | [2]                |
| Potato     | conventional | 3.8   | 1.1  | 4  | [7]                |
| Potato     | organic      | 8.4   | 2.2  | 3  | [7]                |
| Pumpkin    | organic      | 5.7   |      | 3  | [2]                |
| Pumpkin    | conventional | 3.5   |      | 3  | [2]                |
| Rice       | conventional | 3.0   | 0.3  | 3  | [17]               |
| Rice       | conventional | 3.5   | 0.3  | 3  | [17]               |
| Rice       | conventional | 4.1   | 1.2  | 3  | [17]               |
| Rice       | conventional | 4.11  |      | 5  | [18]               |
| Rice       | conventional | 3.87  | 0.89 | 60 | [19]               |
| Rice       | organic      | 4.9   | 0.3  | 3  | [17]               |
| Rice       | organic      | 5.5   | 0.1  | 3  | [17]               |
| Rice       | organic      | 4.8   | 0.1  | 3  | [17]               |
| Rice       | organic      | 6.02  |      | 5  | [18]               |
| Rice       | organic      | 6.07  | 0.65 | 60 | [19]               |
| Rocket     | conventional | 1.1   | 1.6  | 3  | [7]                |
| Rocket     | organic      | 7.2   | 4.1  | 5  | [7]                |
| Sesame     | conventional | 5.7   |      | 1  | [1]                |
| Sesame     | organic      | 17.8  | 4.8  | 2  | [1]                |
| Spinach    | conventional | 3.05  | 0.94 | 22 | [3]                |
| Spinach    | conventional | 5.6   | 1.1  | 2  | [1]                |
| Spinach    | organic      | 12.20 | 1.26 | 20 | [3]                |
| Spinach    | organic      | 11.06 | 1.53 | 20 | [3]                |
| Spinach    | organic      | 7.20  | 1.66 | 14 | [3]                |
| Spinach    | organic      | 9.5   | 0.2  | 2  | [1]                |
| Strawberry | conventional | 2.5   |      | 82 | [9] data from [10] |
| Strawberry | organic      | 3.5   |      | 82 | [9] data from [10] |
| Tomato     | conventional | -1.2  |      | 3  | [2]                |
| Tomato     | conventional | -0.7  |      | 3  | [2]                |
| Tomato     | conventional | 7.8   |      | 3  | [2]                |

|        |              |      |      |    |                    |
|--------|--------------|------|------|----|--------------------|
| Tomato | conventional | 2.09 | 0.78 | 6  | [20]               |
| Tomato | organic      | 8.1  | 3.2  | 61 | [6]                |
| Tomato | organic      | 6.9  |      | 3  | [2]                |
| Tomato | conventional | -0.1 | 2.1  | 46 | [6]                |
| Tomato | conventional | -2.4 |      |    | [14]               |
| Tomato | conventional | 0    |      |    | [14]               |
| Tomato | conventional | 1.19 | 1.71 | 5  | [3]                |
| Tomato | conventional | 1.28 | 1.34 | 5  | [3]                |
| Tomato | conventional | 4.4  | 3.2  | 3  | [7]                |
| Tomato | conventional | 0.92 | 0.30 | 6  | [20]               |
| Tomato | conventional | 1.34 | 0.23 | 6  | [20]               |
| Tomato | conventional | 0.24 | 0.04 | 6  | [20]               |
| Tomato | conventional | 0.43 | 0.11 | 6  | [20]               |
| Tomato | conventional | 0.32 | 0.08 | 6  | [20]               |
| Tomato | conventional | -2.5 | 2.0  |    | [8] data from [5]  |
| Tomato | conventional | 0.3  | 0.6  |    | [21] data from [5] |
| Tomato | organic      | 7.3  |      | 3  | [2]                |
| Tomato | organic      | 9.3  |      |    | [14]               |
| Tomato | organic      | 5.57 | 2.66 | 20 | [3]                |
| Tomato | organic      | 0.70 | 0.59 | 2  | [3]                |
| Tomato | organic      | 4.88 | 0.97 | 4  | [3]                |
| Tomato | organic      | 7.82 | 2.16 | 5  | [3]                |
| Tomato | organic      | 8.0  | 1.3  | 3  | [7]                |
| Tomato | organic      | 5.46 | 0.90 | 6  | [20]               |
| Tomato | organic      | 2.63 | 0.43 | 6  | [20]               |
| Tomato | organic      | 2.35 | 0.54 | 6  | [20]               |
| Tomato | organic      | 1.28 | 0.15 | 6  | [20]               |
| Tomato | organic      | 1.61 | 0.18 | 6  | [20]               |
| Tomato | organic      | 0.90 | 0.07 | 6  | [20]               |
| Tomato | organic      | 5.9  | 2.0  |    | [8] data from [5]  |
| Tomato | organic      | 7.1  | 0.7  |    | [21] data from [5] |
| Wheat  | organic      | 7.3  | 0.6  | 2  | [22]               |

|          |              |      |     |   |      |
|----------|--------------|------|-----|---|------|
| Wheat    | conventional | 2.3  | 1.0 |   | [14] |
| Wheat    | conventional | 1.4  | 0.4 | 2 | [22] |
| Wheat    | conventional | 1.2  | 0.3 | 2 | [22] |
| Wheat    | conventional | 1.1  | 0.1 | 2 | [22] |
| Wheat    | organic      | 3.6  | 1.6 |   | [14] |
| Wheat    | organic      | 5.4  | 0.3 | 2 | [22] |
| Wheat    | organic      | 7.3  | 0.1 | 2 | [22] |
| Wheat    | organic      | 2.6  | 0.4 | 2 | [22] |
| Wheat    | organic      | 0.8  | 0.4 | 2 | [22] |
| Wheat    | organic      | 0.5  | 0.3 | 2 | [22] |
| Zucchini | conventional | 2.4  |     | 3 | [2]  |
| Zucchini | organic      | 10.6 |     | 3 | [2]  |

---

SD, standard deviation.

**Text S1. Calculations of the effect of organic food intake on tissue proteins  $\delta^{15}\text{N}$ .**

In order to relate the  $\delta^{15}\text{N}$  of tissue proteins ( $\delta^{15}\text{N}_{\text{tissue proteins}}$ ) to the  $\delta^{15}\text{N}$  of consumed animal proteins ( $\delta^{15}\text{N}_{\text{animal}}$ ) and plant proteins ( $\delta^{15}\text{N}_{\text{plants}}$ ), a two-sources isotope mixing model was used:

$$\delta^{15}\text{N}_{\text{tissue proteins}} = \delta^{15}\text{N}_{\text{animal}} \times P_{\text{animal}} + \delta^{15}\text{N}_{\text{plants}} \times (1 - P_{\text{animal}}) + \Delta^{15}\text{N}_{\text{tissue-diet}} \quad (1)$$

where  $\delta^{15}\text{N}_{\text{animal}}$  and  $\delta^{15}\text{N}_{\text{plants}}$  are weighted by  $P_{\text{animal}}$  and  $1 - P_{\text{animal}}$ , the proportions of dietary proteins occupied by animal and plant proteins, respectively (and where protein refers to protein nitrogen).  $\Delta^{15}\text{N}_{\text{tissue-diet}}$  is the isotopic offset between tissue and dietary proteins, often referred to as the trophic step or discrimination factor. The effect of organic plant intake on  $\delta^{15}\text{N}_{\text{plants}}$  was then similarly calculated with a two-sources isotope mixing model accounting for organic and conventional plants intake:

$$\delta^{15}\text{N}_{\text{plants}} = \delta^{15}\text{N}_{\text{org plants}} \times P_{\text{org}} + \delta^{15}\text{N}_{\text{conv plants}} \times (1 - P_{\text{org}}) \quad (2)$$

where  $\delta^{15}\text{N}_{\text{org plants}}$  and  $\delta^{15}\text{N}_{\text{conv plants}}$  are the weighted average of the  $\delta^{15}\text{N}$  of consumed organically and conventionally grown plants, respectively.  $P_{\text{org}}$  is the proportion of dietary plant proteins occupied by proteins from organically grown plants and  $1 - P_{\text{org}}$  is the proportion occupied by conventionally grown plants (and where protein refers to protein nitrogen). Rearranging equation 2 and substituting it into equation 1 yields the following equation:

$$\delta^{15}\text{N}_{\text{tissue proteins}} = \delta^{15}\text{N}_{\text{animal}} \times P_{\text{animal}} + [ \delta^{15}\text{N}_{\text{conv plants}} + (\delta^{15}\text{N}_{\text{org plants}} - \delta^{15}\text{N}_{\text{conv plants}}) \times P_{\text{org}} ] \times (1 - P_{\text{animal}}) + \Delta^{15}\text{N}_{\text{tissue-diet}} \quad (3)$$

The difference between  $\delta^{15}\text{N}_{\text{org plants}}$  and  $\delta^{15}\text{N}_{\text{conv plants}}$  has already been reported in the literature using the capital delta notation ( $\Delta^{15}\text{N}_{\text{org-conv}} = \delta^{15}\text{N}_{\text{org plants}} - \delta^{15}\text{N}_{\text{conv plants}}$ ), therefore to simplify the equation, this notation was substituted into equation 3:

$$\delta^{15}\text{N}_{\text{tissue proteins}} = \delta^{15}\text{N}_{\text{animal}} \times P_{\text{animal}} + (\delta^{15}\text{N}_{\text{conv plants}} + \Delta^{15}\text{N}_{\text{org-conv}} \times P_{\text{org}}) \times (1 - P_{\text{animal}}) + \Delta^{15}\text{N}_{\text{tissue-diet}} \quad (4)$$

When organic plants with a higher  $\delta^{15}\text{N}$  than conventionally grown plants are consumed, the effect on  $\delta^{15}\text{N}_{\text{tissue proteins}}$  can be calculated and is referred here as the error. The absolute error is the difference between the actual measured value obtained with equation 4 and the expected values when no organic plants are consumed, which is also obtained with equation 4, but with  $P_{\text{org}}$  set at 0. Subtracting these two equations gives:

$$\delta^{15}\text{N absolute error} = \Delta^{15}\text{N}_{\text{org-conv}} \times P_{\text{org}} \times (1 - P_{\text{animal}}) \quad (5)$$

The relative error was then calculated by dividing the absolute error by the expected value when no organic plants are consumed, obtained from equation 4 with  $P_{\text{org}}$  set at 0:

$$\delta^{15}\text{N relative error} = 100 \times \Delta^{15}\text{N}_{\text{org-conv}} \times P_{\text{org}} \times (1 - P_{\text{animal}}) / [ \delta^{15}\text{N}_{\text{animal}} \times P_{\text{animal}} + \delta^{15}\text{N}_{\text{conv plants}} \times (1 - P_{\text{animal}}) + \Delta^{15}\text{N}_{\text{tissue-diet}} ] \quad (6)$$

**References**

1. Choi, W.-J.; Ro, H.-M.; Hobbie, E.A. Patterns of natural  $^{15}\text{N}$  in soils and plants from chemically and organically fertilized uplands. *Soil Biol. Biochem.* 2003, 35, 1493–1500.
2. Rogers, K.M. Nitrogen isotopes as a screening tool to determine the growing regimen of some organic and nonorganic supermarket produce from New Zealand. *J. Agric. Food Chem.* 2008, 56, 4078–4083.
3. Verenitch, S.; Mazumder, A. Isotopic characterization as a screening tool in authentication of organic produce commercially available in western North America. *Isot. Environ. Health Stud.* 2015, 51, 332–343.
4. Yuan, Y.; Zhao, M.; Zhang, Z.; Chen, T.; Yang, G.; Wang, Q. Effect of different fertilizers on nitrogen isotope composition and nitrate content of *Brassica campestris*. *J. Agric. Food Chem.* 2012, 60, 1456–1460.
5. Inácio, C.T.; Chalk, P.M.; Magalhães, A.M. Principles and limitations of stable isotopes in differentiating organic and conventional foodstuffs: 1. Plant products. *Crit. Rev. Food Sci. Nutr.* 2015, 55, 1206–1218.
6. Bateman, A.S.; Kelly, S.D.; Woolfe, M. Nitrogen isotope composition of organically and conventionally grown crops. *J. Agric. Food Chem.* 2007, 55, 2664–2670.
7. Šturm, M.; Lojen, S. Nitrogen isotopic signature of vegetables from the Slovenian market and its suitability as an indicator of organic production. *Isot. Environ. Health Stud.* 2011, 47, 214–220.
8. Bateman, A.S.; Kelly, S.D.; Jickells, T.D. Nitrogen isotope relationships between crops and fertilizer: Implications for using nitrogen isotope analysis as an indicator of agricultural regime. *J. Agric. Food Chem.* 2005, 53, 5760–5765.
9. Camin, F.; Perini, M.; Bontempo, L.; Fabroni, S.; Faedi, W.; Magnani, S.; Baruzzi, G.; Bonoli, M.; Tabilio, M.; Musmeci, S. Potential isotopic and chemical markers for characterising organic fruits. *Food Chem.* 2011, 125, 1072–1082.
10. Huelsemann, F.; Koehler, K.; Braun, H.; Schaenzer, W.; Flenker, U. Human dietary  $\delta^{15}\text{N}$  intake: Representative data for principle food items. *Am. J. Phys. Anthropol.* 2013, 152, 58–66.
11. Šturm, M.; Kacjan-Maršič, N.; Lojen, S. Can  $\delta^{15}\text{N}$  in lettuce tissues reveal the use of synthetic nitrogen fertiliser in organic production? *J. Sci. Food Agric.* 2011, 91, 262–267.
12. Szpak, P.; Millaire, J.-F.; White, C.D.; Longstaffe, F.J. Influence of seabird guano and camelid dung fertilization on the nitrogen isotopic composition of field-grown maize (*Zea mays*). *J. Archaeol. Sci.* 2012, 39, 3721–3740.
13. Rapisarda, P.; Camin, F.; Fabroni, S.; Perini, M.; Torrisi, B.; Intrigliolo, F. Influence of different organic fertilizers on quality parameters and the  $\delta^{15}\text{N}$ ,  $\delta^{13}\text{C}$ ,  $\delta^2\text{H}$ ,  $\delta^{34}\text{S}$ , and  $\delta^{18}\text{O}$  values of orange fruit (*Citrus sinensis* L. Osbeck). *J. Agric. Food Chem.* 2010, 58, 3502–3506.
14. Schmidt, H.; Roßmann, A.; Voerkelius, S.; Schnitzler, W.H.; Georgi, M.; Graßmann, J.; Zimmermann, G.; Winkler, R. Isotope characteristics of vegetables and wheat from conventional and organic production. *Isot. Environ. Health Stud.* 2005, 41, 223–228.
15. del Amor, F.M.; Navarro, J.; Aparicio, P.M. Isotopic discrimination as a tool for organic farming certification in sweet pepper. *J. Environ. Qual.* 2008, 37, 182–185.
16. Camin, F.; Moschella, A.; Miselli, F.; Parisi, B.; Versini, G.; Ranalli, P.; Bagnaresi, P. Evaluation of markers for the traceability of potato tubers grown in an organic versus conventional regime. *J. Sci. Food Agric.* 2007, 87, 1330–1336.
17. Yuan, Y.; Zhang, W.; Zhang, Y.; Liu, Z.; Shao, S.; Zhou, L.; Rogers, K.M. Differentiating organically farmed rice from conventional and green rice harvested from an experimental field trial using stable isotopes and multi-element chemometrics. *J. Agric. Food Chem.* 2018, 66, 2607–2615.
18. Chung, I.-M.; Kim, J.-K.; An, Y.-J.; Kwon, C.; Kim, S.-Y.; Yang, Y.-J.; Yarnes, C.T.; Chi, H.-Y.; Kim, S.-H. Compound-specific  $\delta^{13}\text{C}$  and  $\delta^{15}\text{N}$  analyses of fatty acids and amino acids for discrimination of organic, pesticide-free, and conventional rice (*Oryza sativa* L.). *Food Chem.* 2019, 283, 305–314.
19. Chung, I.-M.; Park, S.-K.; Lee, K.-J.; An, M.-J.; Lee, J.-H.; Oh, Y.-T.; Kim, S.-H. Authenticity testing of environment-friendly Korean rice (*Oryza sativa* L.) using carbon and nitrogen stable isotope ratio analysis. *Food Chem.* 2017, 234, 425–430.
20. Pieper, J.R.; Barrett, D.M. Effects of organic and conventional production systems on quality and nutritional parameters of processing tomatoes. *J. Sci. Food Agric.* 2009, 89, 177–194.
21. Nakano, A.; Uehara, Y.; Yamauchi, A. Effect of organic and inorganic fertigation on yields,  $\delta^{15}\text{N}$  values, and  $\delta^{13}\text{C}$  values of tomato (*Lycopersicon esculentum* Mill. cv. Saturn). *Plant and Soil* 2003, 255, 343–349, doi:10.1023/A:1026180700963.

22. Laursen, K.H.; Mihailova, A.; Kelly, S.; Epov, V.; Bérail, S.; Schjørring, J.K.; Donard, O.; Larsen, E.H.; Pedentchouk, N.; Marca-Bell, A. Is it really organic?—Multi-isotopic analysis as a tool to discriminate between organic and conventional plants. *Food Chem.* 2013, 141, 2812–2820.

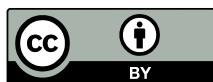

© 2020 by the authors. Submitted for possible open access publication under the terms and conditions of the Creative Commons Attribution (CC BY) license (<http://creativecommons.org/licenses/by/4.0/>).
